# Supplementary material for: Beyond the Binding Site: The Role of the β2 – β3 Loop and Extra-Domain Structures in PDZ Domains
Source: PLOS journal article supplement (doi:10.1371/journal.pcbi.1002429), 2012-03-08
Supplement: S5 (10.1371/journal.pcbi.1002429.s005) [file journal.pcbi.1002429.s005]

| name                        | # runs | Tot. Sim. Time ( $\mu s$ ) | Unbinding Times (ns) | # $H_2O$ |
|-----------------------------|--------|----------------------------|----------------------|----------|
| <i>PDZ3</i> CRIPT5          | 4      | 0.424                      | 13, 34, 65, 108      | 4699     |
| <i>PDZ3</i> CRIPT9          | 4      | 0.697                      | -                    | 6001     |
| <i>PDZ3</i> <sub>apo</sub>  | 4      | 0.918                      | -                    | 4385     |
| $\Delta 7$ CRIPT5           | 4      | 0.262                      | 19, 22, 45, 57       | 4596     |
| $\Delta 7$ CRIPT5*          | 4      | 0.792                      | -                    | 4597     |
| $\Delta 7$ CRIPT9           | 4      | 0.705                      | -                    | 6027     |
| $\Delta 7$ <sub>apo</sub>   | 4      | 0.934                      | -                    | 4425     |
| <i>V328I</i>                | 4      | 0.787                      | -                    | 5999     |
| <i>V328I</i> <sub>apo</sub> | 4      | 0.917                      | -                    | 4388     |
| <i>V328A</i>                | 4      | 0.773                      | -                    | 6000     |
| <i>V328A</i> <sub>apo</sub> | 4      | 0.987                      | -                    | 4389     |
| <i>PDZ2</i>                 | 3      | 0.579                      | -                    | 6750     |
| Total                       | 47     | 8.775                      |                      |          |
